# Supplementary material for: Rapid and scalable synthesis of sulfur quantum dots through ozone etching: photoluminescence and FRET-mediated Co2+ sensing
Source: Royal Society of Chemistry journal article supplement (doi:10.1039/d2nj06195c), 2023-01-01
Supplement: d2nj06195c2.pdf [file d2nj06195c2.pdf]

Electronic Supplementary Material (ESI) for New Journal of Chemistry.  
This journal is © The Royal Society of Chemistry 2023

## Rapid and Scalable Synthesis of Sulfur Quantum Dots through Ozone Etching: Photoluminescence and FRET mediated Co<sup>2+</sup> Sensing

R V Reji,<sup>a</sup> V Biju\*<sup>a</sup>

<sup>a</sup> Department of Physics, University of Kerala, Thiruvananthapuram- 695581, Kerala, India

**Table S1.** Comparison of different methods for the synthesis of luminescent SQDs from elemental sulfur.

| Synthetic method                                                   | Reaction time (h) | Reaction temperature (°C) | PLQY (%) | Reference    |
|--------------------------------------------------------------------|-------------------|---------------------------|----------|--------------|
| Assembly-fission synthesis                                         | 125               | 70                        | 3.8      | 1            |
| Assembly-fission followed by H <sub>2</sub> O <sub>2</sub> etching | 125               | 70                        | 23       | 2            |
| Hydrothermal fission-aggregation mechanism                         | 4                 | 170                       | 4.02     | 3            |
| Oxygen acceleration                                                | 10                | 90                        | 21.5     | 4            |
| Ultrasonication-promoted synthesis                                 | 12                | -                         | 2.1      | 5            |
| Copper-Ion-Assisted Precipitation Etching Method                   | 74                | 70                        | 32.8     | 6            |
| Microwave-assisted synthesis                                       | 55                | 70                        | 49.25    | 7            |
| Bubbling-assisted strategy                                         | 96                | 70                        | 8        | 8            |
| Ultrasound-microwave-assisted etching with hydrogen peroxide       | 2                 | 70                        | 58.6     | 9            |
| Solvothermal Synthesis                                             | 42                | 220                       | 10.30    | 10           |
| Dielectric barrier discharge-accelerated one-pot synthesis         | 20                | -                         | 2.0      | 11           |
| Mechanical grinding assisted approach                              | 1                 | -                         | 21       | 12           |
| Ethylenediamine-assisted solvothermal treatment                    | 5                 | 170                       | 87.8     | 13           |
| Ethylenediamine-assisted acceleration strategy                     | 6                 | 70                        | 14.22    | 14           |
| Ethanol assisted solvothermal treatment                            | 36                | 220                       | 7.04     | 15           |
| solvent-type passivation strategy                                  | 4                 | 160                       | 8.7      | 16           |
| Ozone assisted top- down approach                                  | 4                 | 90                        | 9.26     | Present work |

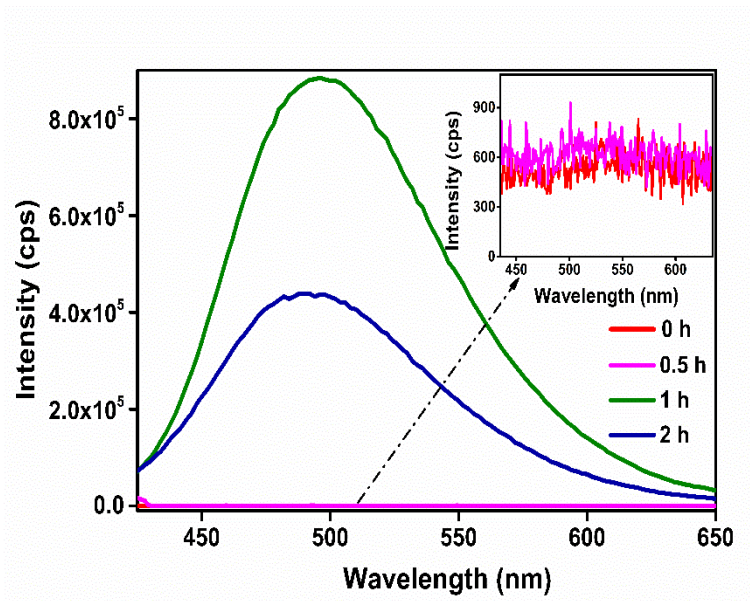

**Fig. S1.** PL spectra (excited at 410 nm) of S dots with different durations of ozone treatment as indicated on the frame.

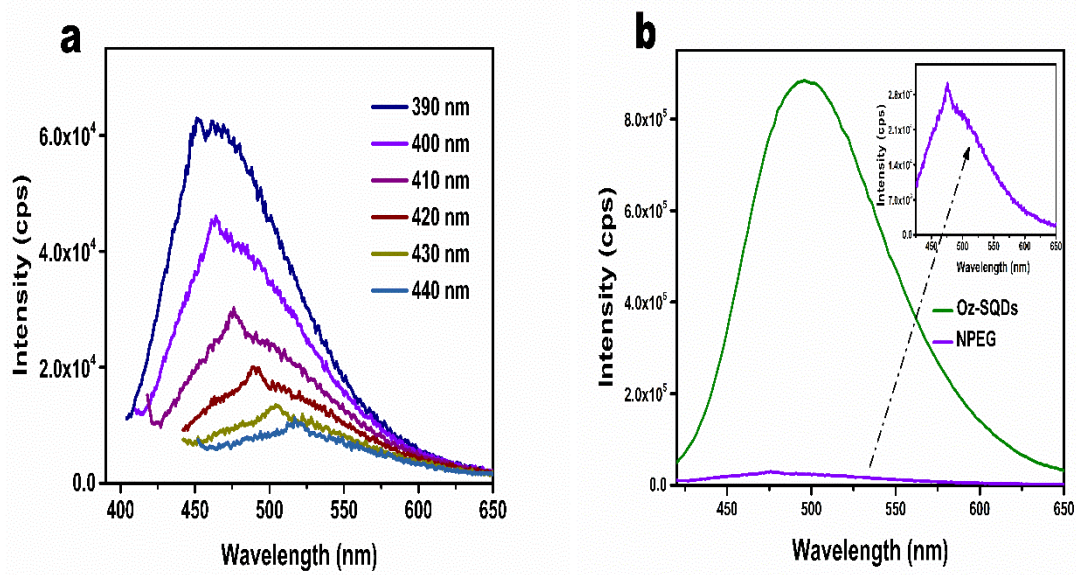

**Fig. S2.** (a) PL spectra of NPEG at different excitation wavelengths. (b) PL spectra (excited at 410 nm) of NPEG and Oz-SQDs.

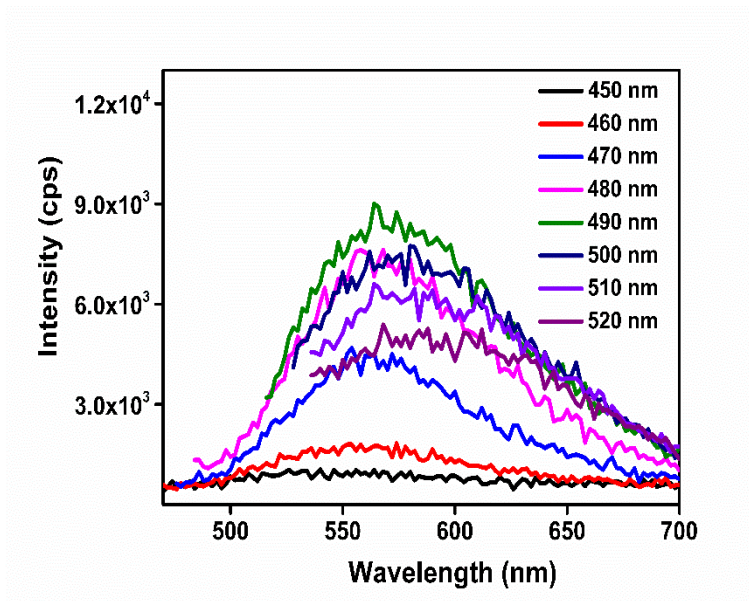

**Fig. S3.** Excitation-independent PL spectra of S dots.

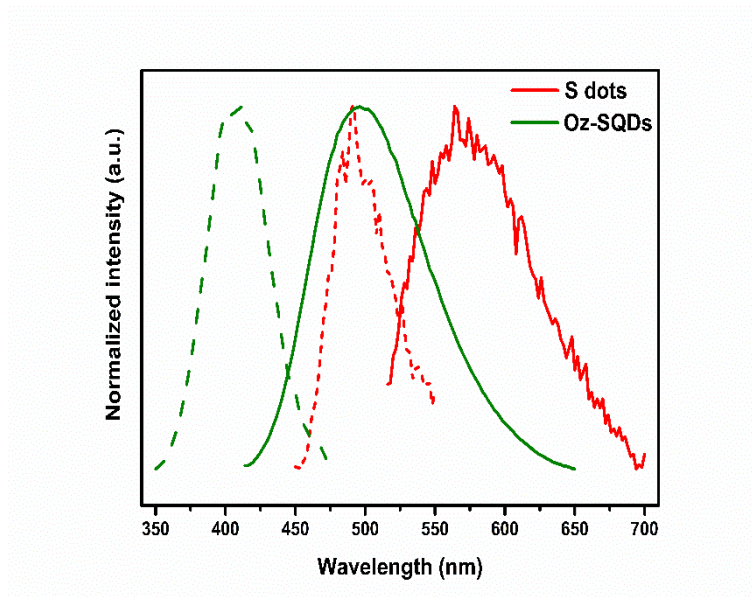

**Fig. S4.** PL (solid red line, excited at 490 nm), PLE (dash red line, detected at 575 nm) of S dots and PL (solid green line, excited at 410 nm), PLE (dash green line, detected at 496 nm) of Oz-SQDs.

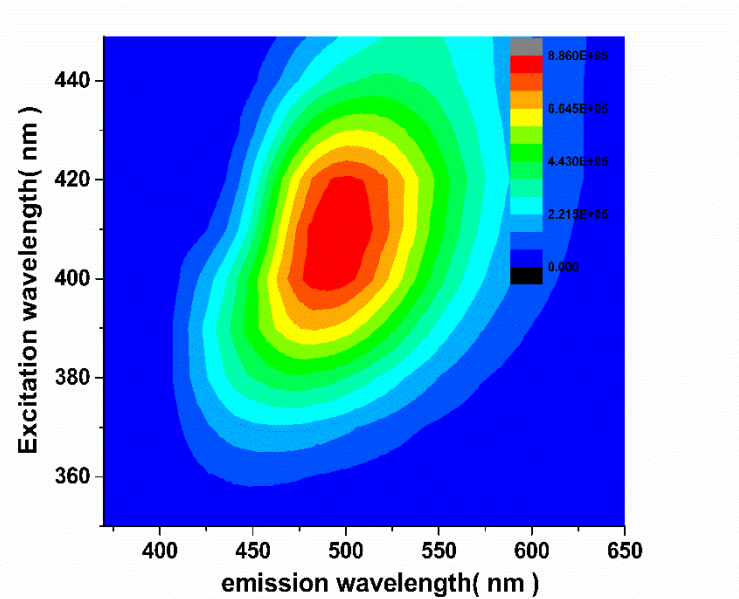

**Fig. S5.** The three-dimensional excitation and emission matrix (3D-EEM) fluorescence spectrum of Oz-SQDs.

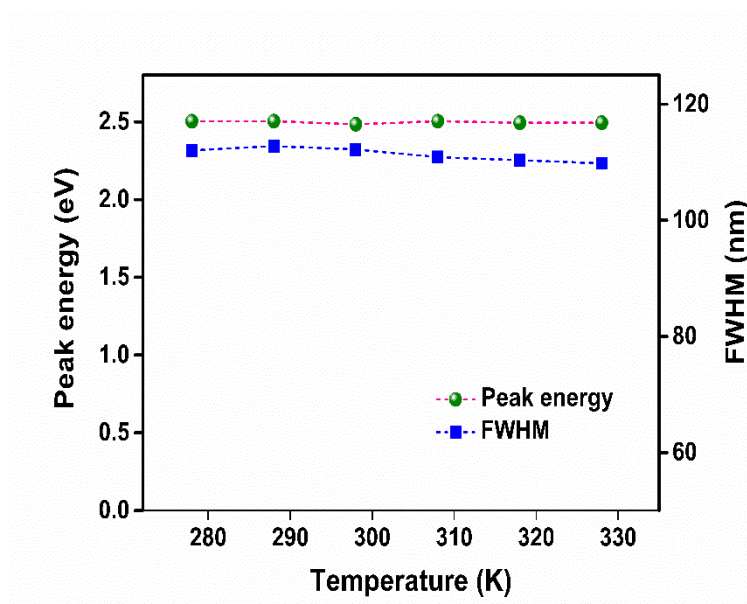

**Fig. S6.** PL peak energy and FWHM as a function of the temperature.

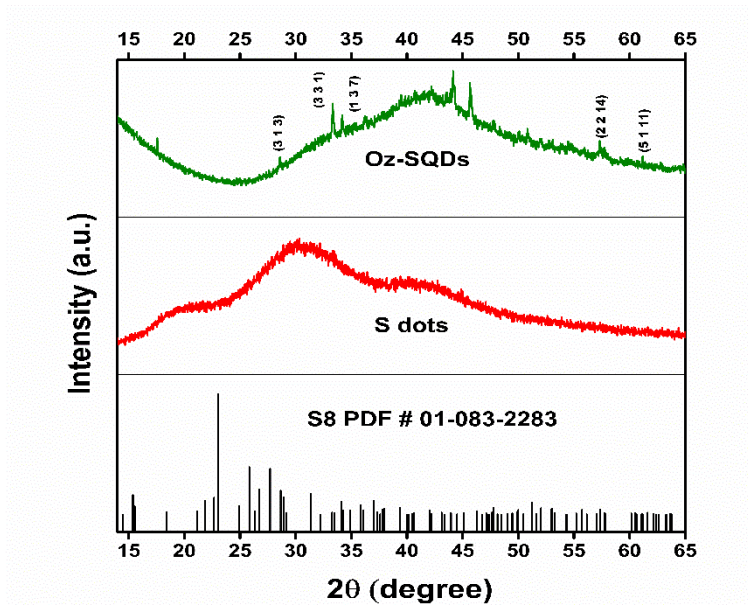

Fig. S7. XRD patterns of S dots and Oz- SQDs.

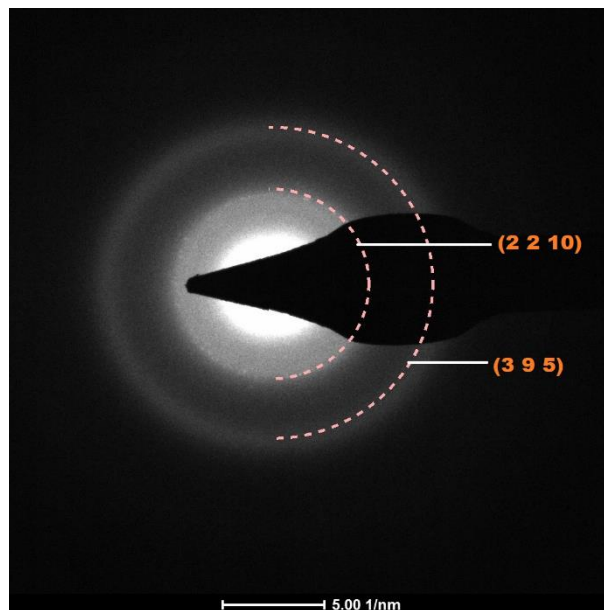

Fig. S8. SAED pattern of S dots.

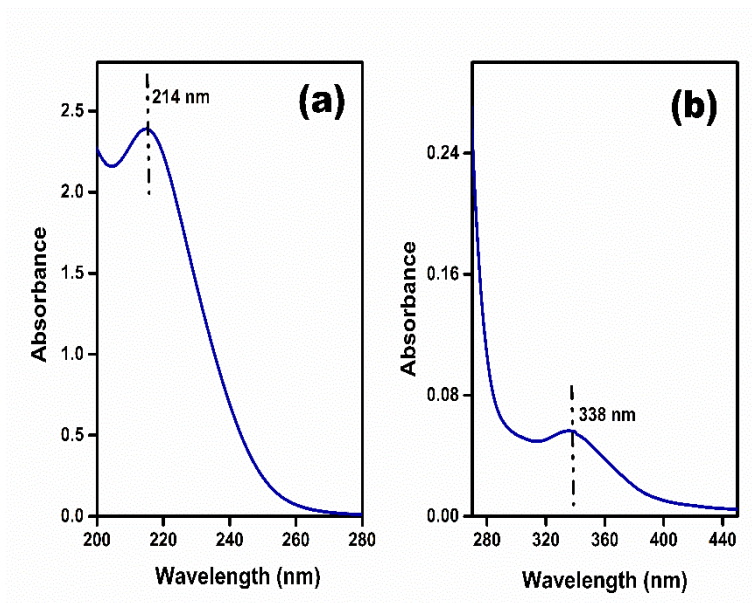

**Fig. S9.** UV-Visible absorption spectra of the sample with 2h ozone treatment after diluting (a) 2000 times with water (b) 100 times with water.

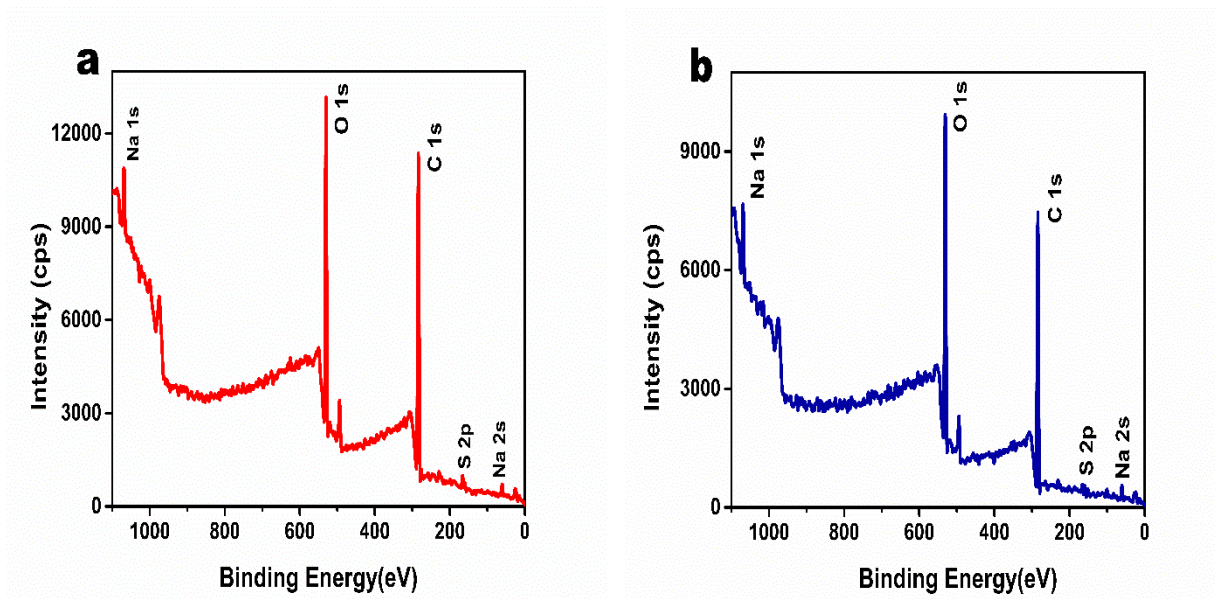

**Fig. S10.** (a) XPS survey spectra of (a) S dots (b) Sample with 2 h ozone treatment.

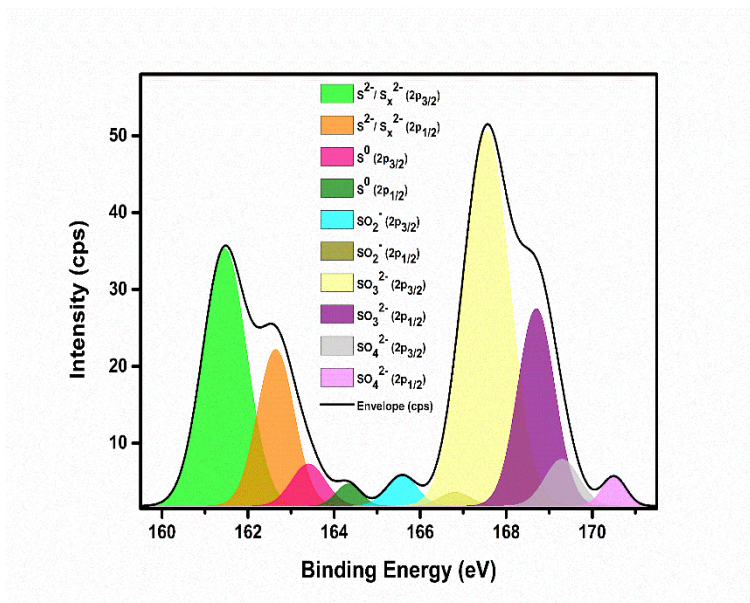

Fig. S11. S2p XPS spectrum of the sample with 2 h ozone treatment.

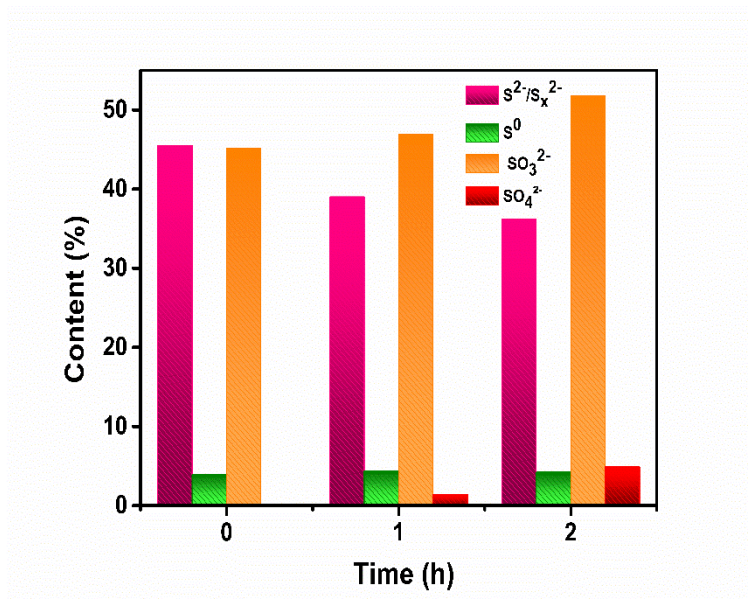

Fig. S12. Variation in the amount of different sulfur species with ozone treatment duration.

**Table S2.** Comparison of different methods for the determination of  $\text{Co}^{2+}$ .

| Methods        | Sensing material                                   | Linear range ( $\mu\text{M}$ ) | Detection limit ( $\mu\text{M}$ ) | Reference    |
|----------------|----------------------------------------------------|--------------------------------|-----------------------------------|--------------|
| Fluorometric   | Carbon dots                                        | 0 - 40                         | 0.45                              | 17           |
| Fluorometric   | Nitrogen and sulfur co-doped graphene quantum dots | 0 - 40                         | 1.25                              | 18           |
| Potentiometric | p-(4-n-butylphenylazo) calix[4]arene               | 9.2- 10000                     | 4.00                              | 19           |
| Colorimetric   | Biofunctionalized silver nanoparticles             | 5 - 100                        | 7.00                              | 20           |
| Fluorometric   | Sulfur quantum dots                                | 0 - 90                         | 0.02                              | 21           |
| Fluorometric   | Sulfur quantum dots                                | 0-25                           | 1.57                              | 22           |
| Fluorometric   | Cysteine-decorated sulfur dots                     | 0 - 40                         | 0.16                              | 23           |
| Fluorometric   | Sulfur quantum dots                                | 19.6 – 56.6                    | 2.44                              | Present work |

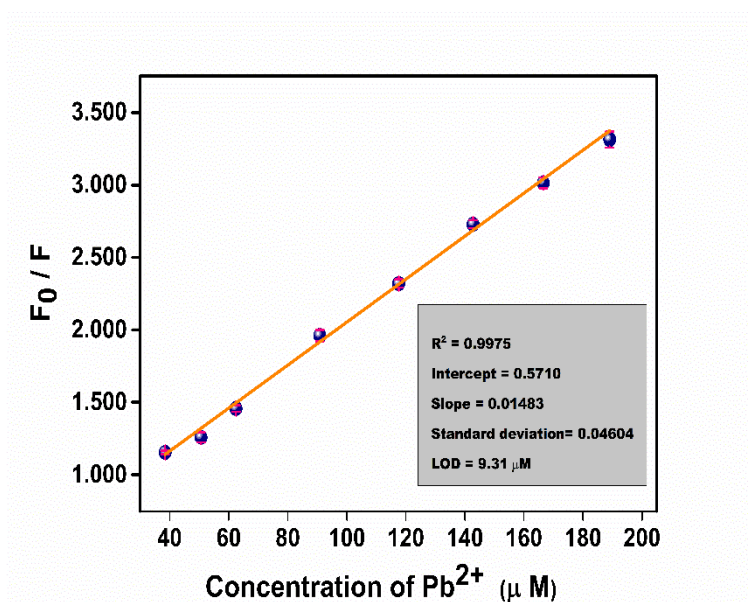

**Fig. S13.**  $F_0 / F$  value of the Oz-SQDs against different concentrations of  $\text{Pb}^{2+}$ .



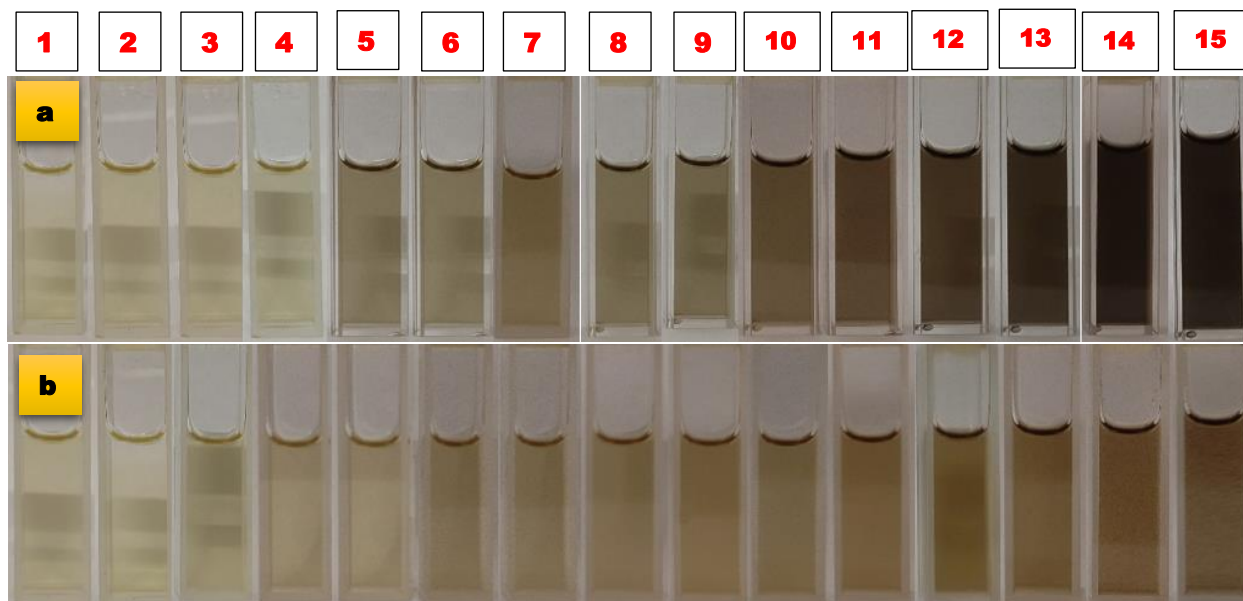

**Fig. S14.** Color of the Oz-SQDs aqueous solution after adding different concentrations of (a)  $\text{Co}^{2+}$  (b)  $\text{Pb}^{2+}$

[ (1). 0  $\mu\text{M}$ , (2). 19.6  $\mu\text{M}$ , (3). 22.8  $\mu\text{M}$ , (4) 29.1  $\mu\text{M}$ , (5) 32.2  $\mu\text{M}$ , (6). 38.5  $\mu\text{M}$ , (7). 44.6  $\mu\text{M}$  (8) 56.6  $\mu\text{M}$ , (9) 62.5  $\mu\text{M}$ , (10). 90.9  $\mu\text{M}$ , (11). 117.6  $\mu\text{M}$ , (12). 142.8  $\mu\text{M}$ , (13). 166.6  $\mu\text{M}$ , (14). 210.5  $\mu\text{M}$ , (15). 249.9  $\mu\text{M}$  ]

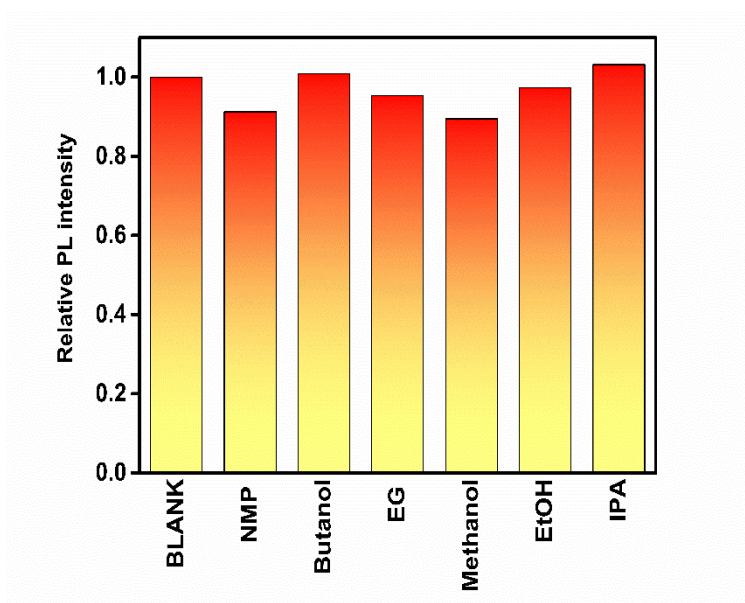

**Fig. S15.** Relative PL intensity of Oz-SQDs in the presence of different organic solvents (3 M); 1-Methyl-2-pyrrolidone (NMP), tert-Butanol ( Butanol), Ethylene glycol (EG), Methanol, Ethanol (EtOH), Isopropyl alcohol (IPA).

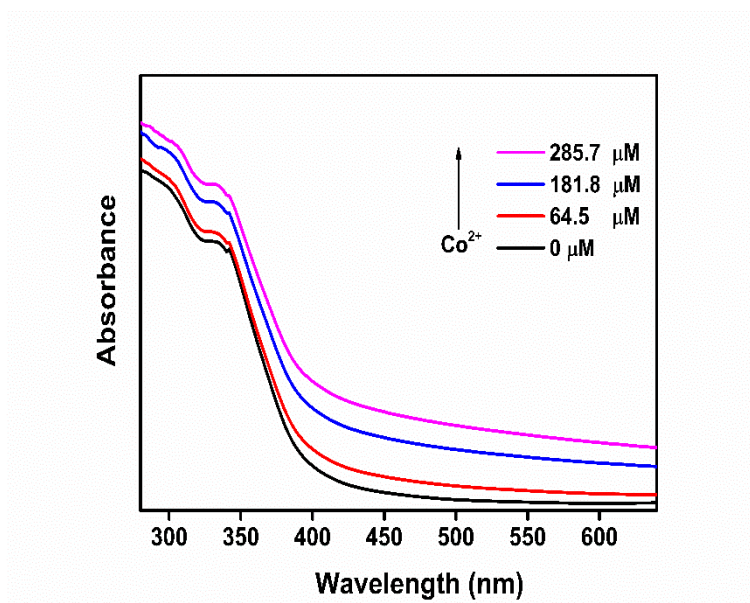

**Fig. S16.** UV-Visible absorption spectra of Oz-SQDs in the presence of different concentrations of  $\text{Co}^{2+}$ .

**Table S3.** PL lifetime components and corresponding amplitude fractions of Oz-SQDs and Oz-SQDs/  $\text{Co}^{2+}$  system.

| Sample                    | $\tau_1$ (ns) | $a_1$ (%) | $\tau_2$ (ns) | $a_2$ (%) | $\tau_{\text{avg}}$ (ns) |
|---------------------------|---------------|-----------|---------------|-----------|--------------------------|
| Oz-SQDs                   | 1.23          | 90.78     | 3.22          | 9.22      | 1.65                     |
| Oz-SQDs/ $\text{Co}^{2+}$ | 0.75          | 97.51     | 3.29          | 2.49      | 1.01                     |

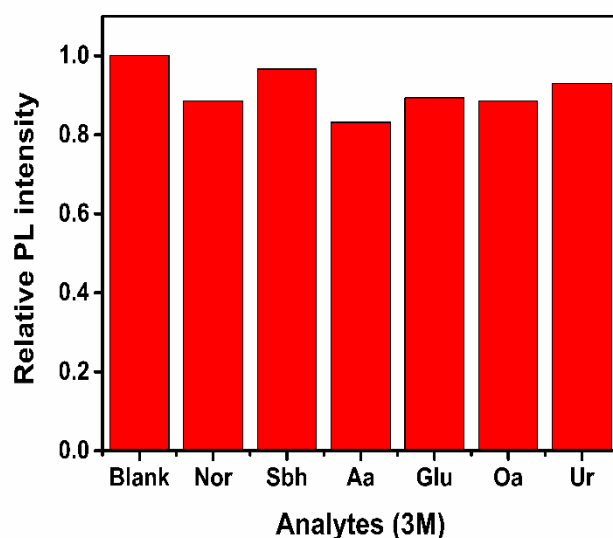

**Fig. S17.** Relative PL intensity of Oz-SQDs/  $\text{Co}^{2+}$  system in the presence of various reducing agents; Norfloxacin (Nor), Sodium borohydride (Sbh), Ascorbic acid (Aa), Glucose (Glu), Oxalic acid (Oa) and Urea (Ur).

## REFERENCES

- 1 L. Shen, H. Wang, S. Liu, Z. Bai, S. Zhang, X. Zhang and C. Zhang, *J. Am. Chem. Soc.*, 2018, **140**, 7878–7884.
- 2 H. Wang, Z. Wang, Y. Xiong, S. V. Kershaw, T. Li, Y. Wang, Y. Zhai and A. L. Rogach, *Angew. Chemie - Int. Ed.*, 2019, **58**, 7040–7044.
- 3 L. Xiao, Q. Du, Y. Huang, L. Wang, S. Cheng, Z. Wang, T. N. Wong, E. K. L. Yeow and H. Sun, *ACS Appl. Nano Mater.*, 2019, **2**, 6622–6628.
- 4 Y. Song, J. Tan, G. Wang, P. Gao, J. Lei and L. Zhou, *Chem. Sci.*, 2020, **11**, 772–777.
- 5 C. Zhang, P. Zhang, X. Ji, H. Wang, H. Kuang, W. Cao, M. Pan, Y. E. Shi and Z. Wang, *Chem. Commun.*, 2019, **55**, 13004–13007.
- 6 Q. Le Li, L. X. Shi, K. Du, Y. Qin, S. J. Qu, D. Q. Xia, Z. Zhou, Z. G. Huang and S. N. Ding, *ACS Omega*, 2020, **5**, 5407–5411.
- 7 Z. Hu, H. Dai, X. Wei, D. Su, C. Wei, Y. Chen, F. Xie, W. Zhang, R. Guo and S. Qu, *RSC Adv.*, 2020, **10**, 17266–17269.
- 8 S. Liu, H. Wang, A. Feng, J. Chang, C. Zhang, Y. Shi, Y. Zhai, V. Biju and Z. Wang, *Nanoscale Adv.*, 2021, **3**, 4271–4275.
- 9 Y. Sheng, Z. Huang, Q. Zhong, H. Deng, M. Lai, Y. Yang, W. Chen, X. Xia and H. Peng, *Nanoscale*, 2021, **13**, 2519–2526.

- 10 C. Wang, Z. Wei, C. Pan, Z. Pan, X. Wang, J. Liu, H. Wang, G. Huang, M. Wang and L. Mao, *Sensors Actuators, B Chem.*, 2021, **344**, 130326.
- 11 M. Yang, C. Li, Y. Tian, L. Wu, J. Hu and X. Hou, *Chem. Commun.*, 2022, **58**, 8614–8617.
- 12 K. S. Sunil, K. Bramhaiah, S. Mandal, S. Kar, N. S. John and S. Bhattacharyya, *Mater. Adv.*, 2022, **3**, 2037–2046.
- 13 P. Gao, Z. Huang, J. Tan, G. Lv and L. Zhou, *ACS Sustainable. Chem. Eng.*, 2022, **10**, 4634–4641.
- 14 F. Yan, M. Xu, J. Xu, Y. Wang, C. Yi, Y. Dong, X. Wang and J. Xu, *Sensors Actuators B Chem.*, 2022, **370**, 132393.
- 15 Z. Wei, W. Lu, C. Pan, J. Ni, H. Zhao, G. Huang and C. Wang, *Dalt. Trans.*, 2022, **51**, 10290–10297.
- 16 C. Wu, S. Zhang, Y. Zheng, A. Wang, Q. Zhao, W. Sun, W. Liu, C. Long and Q. Wang, *Inorg. Chem.*, 2022, **61**, 21157–21168.
- 17 D. Kong, F. Yan, Z. Han, J. Xu, X. Guo and L. Chen, *RSC Adv.*, 2016, **6**, 67481–67487.
- 18 W. Boonta, C. Talodthaisong, S. Sattayaporn, C. Chaicham, A. Chaicham, S. Sahasithiwat, L. Kangkaew and S. Kulchat, *Mater. Chem. Front.*, 2020, **4**, 507–516.
- 19 P. Kumar and Y. B. Shim, *Talanta*, 2009, **77**, 1057–1062.
- 20 Y. Yao, D. Tian and H. Li, *ACS Appl. Mater. Interfaces*, 2010, **2**, 684–690.
- 21 S. Wang, X. Bao, B. Gao and M. Li, *Dalt. Trans.*, 2019, **48**, 8288–8296.
- 22 F. Arshad and M. P. Sk, *ACS Appl. Nano Mater.*, 2020, **3**, 3044–3049.
- 23 L. Li, C. Yang, Y. Li, Y. Nie and X. Tian, *J. Mater. Sci.*, 2021, **56**, 4782–4796.
